# Supplementary material for: Voltage Dependence of Conformational Dynamics and Subconducting States of VDAC-1
Source: PubMed Central journal article supplement — Biophys J. 2016 Sep 20;111(6):1223–34. doi: 10.1016/j.bpj.2016.08.007 (PMC5034351; doi:10.1016/j.bpj.2016.08.007), 2016-09-20
Supplement: mmc1.pdf [file mmc1.pdf]

**Biophysical Journal, Volume 111**

## **Supplemental Information**

### **Voltage Dependence of Conformational Dynamics and Subconducting States of VDAC-1**

**Rodolfo Briones, Conrad Weichbrodt, Licia Paltrinieri, Ingo Mey, Saskia Villinger, Karin Giller, Adam Lange, Markus Zweckstetter, Christian Griesinger, Stefan Becker, Claudia Steinem, and Bert L. de Groot**

Voltage dependence of conformational dynamics and  
sub-conducting states of VDAC-1.  
**SUPPORTING MATERIAL**

R. Briones, C. Weichbrodt, L. Paltrinieri,  
I. Mey, S. Villinger, K. Giller,  
A. Lange, M. Zweckstetter, C. Griesinger,  
S. Becker, C. Steinem, and B. L. de Groot

July 17, 2016

## References

1. Paramo, T., A. East, D. Garzón, M. B. Ulmschneider, and P. J. Bond, 2014. Efficient Characterization of Protein Cavities within Molecular Simulation Trajectories: *trj\_cavity*. *J Chem Theory Comput* 10:2151–2164.

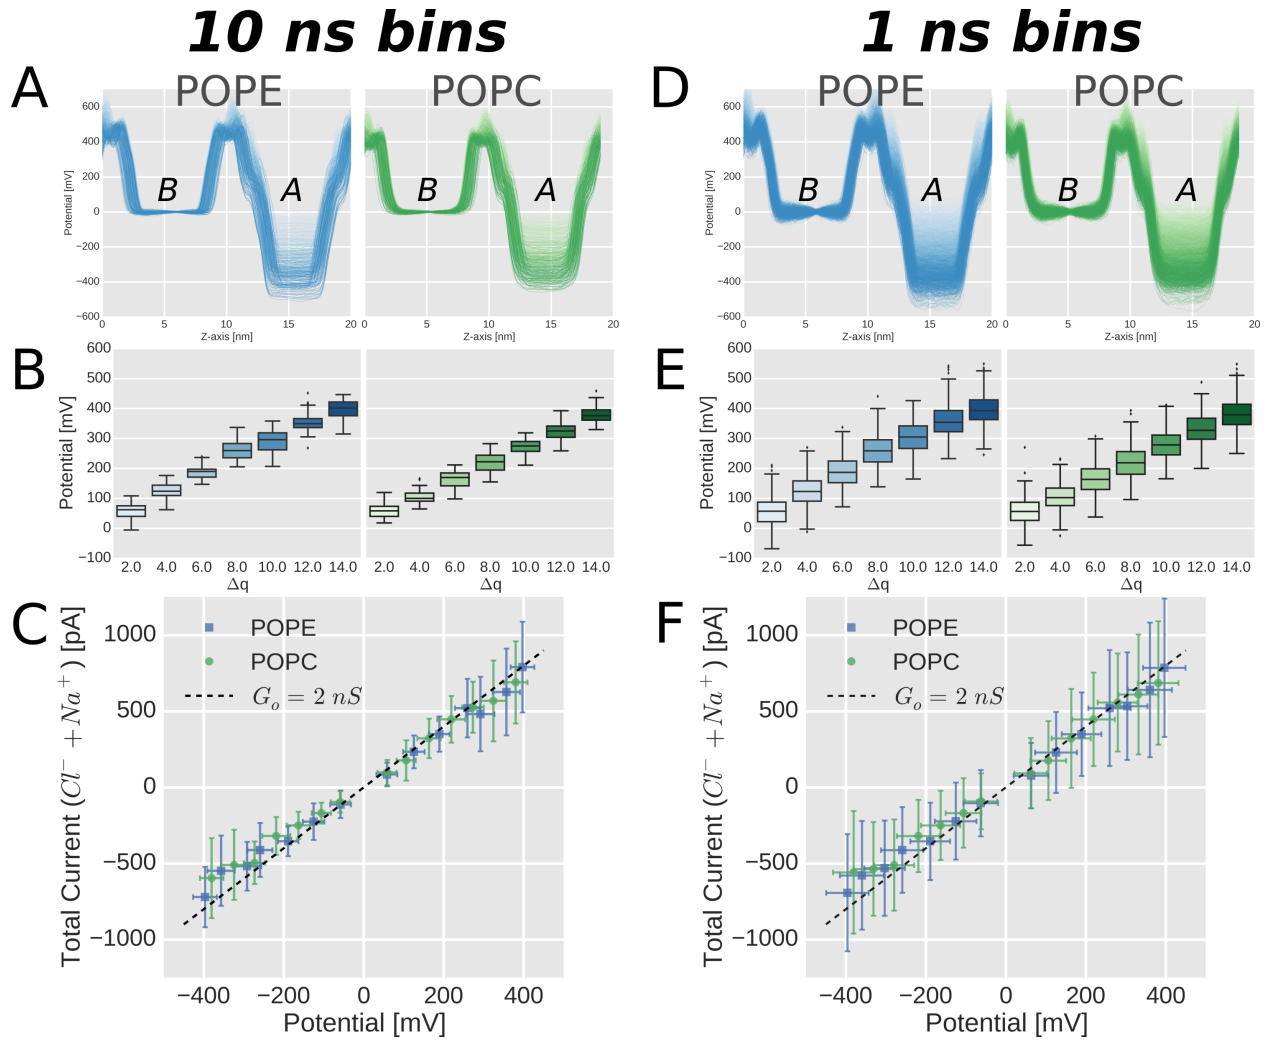

Supplementary Figure S1: **Binning effect on the electrostatic potential and current-voltage ( $I/V$ ) relationship.** **A** and **D** show the potentials across the  $z$ -axis of the double bilayer systems. Labels *A* and *B* indicate the solution region of compartments, where time-averaged potentials differences ( $\Delta V$ ) were calculated using either 10 or 1 *ns* window bins. The curves of POPE and POPC systems for all  $\Delta q$  are shown.  $\Delta q$  increases from 2 to 14 charges and it is shown from *pale blue* to *blue* for POPE, and from *pale green* to *green* for POPC. **B** and **E** show the  $\Delta V$  distribution (quartile box-plots) between compartments *A* and *B* as a function of  $\Delta q$  for POPE and POPC, respectively. **C** and **F** show the  $I/V$  relationships for POPE and POPC. The symbols and crosses depict mean and standard deviations. The experimental ‘open’ VDAC conductance of 2 *nS* at 0.5 M *NaCl* is shown as a *black* segmented line. The mean conductance values ( $\pm SEM$ ) for the negative ( $\ominus$ ) and positive ( $\oplus$ ) voltages were the following: For the 10 *ns* bins:  $\ominus$  1.63 ( $\pm 0.08$ ) and  $\oplus$  1.96 ( $\pm 0.11$ ) *nS* in POPE, and  $\ominus$  1.56 ( $\pm 0.08$ ) and  $\oplus$  1.92 ( $\pm 0.10$ ) *nS* in POPC. For the 1 *ns* bins:  $\ominus$  1.62 ( $\pm 0.05$ ) and  $\oplus$  1.94 ( $\pm 0.06$ ) *nS* in POPE, and  $\ominus$  1.58 ( $\pm 0.05$ ) and  $\oplus$  1.89 ( $\pm 0.06$ ) *nS* in POPC.

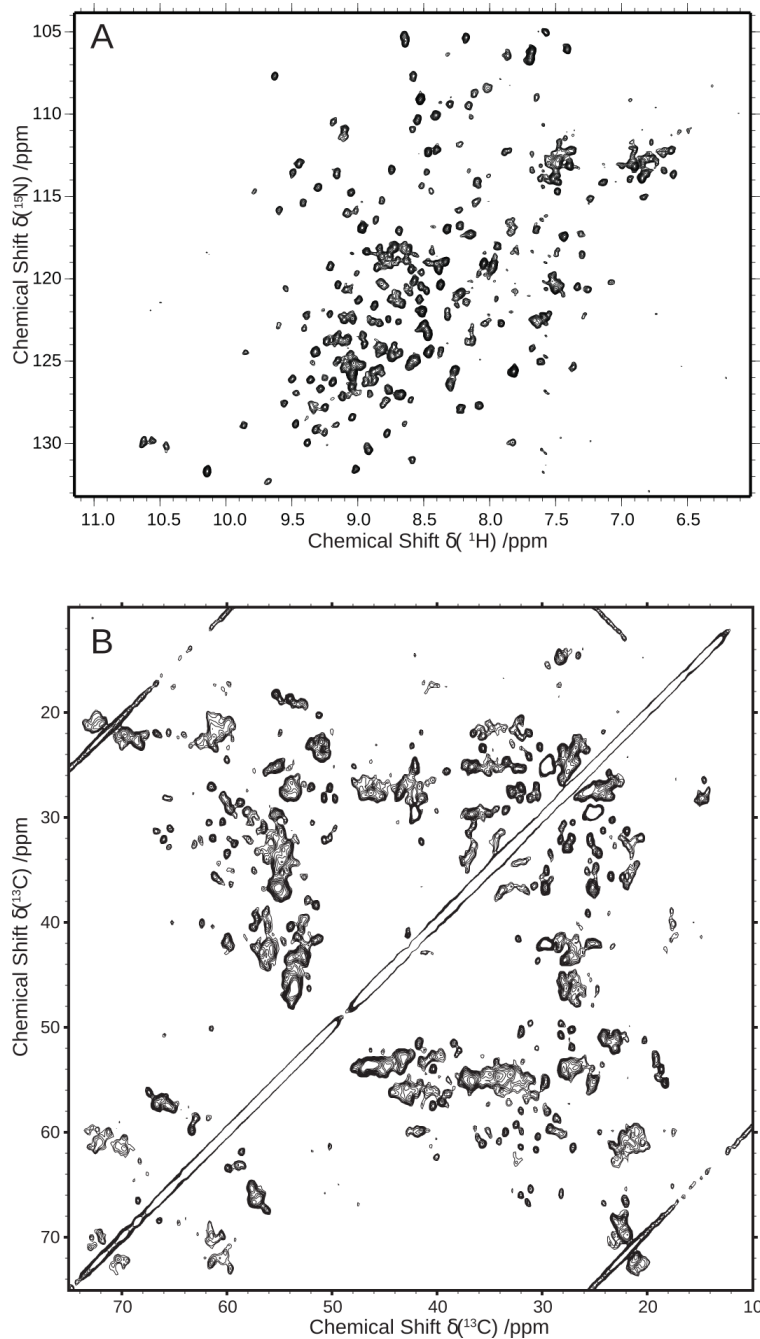

Supplementary Figure S2: **NMR spectra of wild-type hVDAC-1.** A.  $^1\text{H}$ ,  $^{15}\text{N}$ -TROSY spectrum of wild-type hVDAC-1 in LDAO. B.  $^{13}\text{C}$ - $^{13}\text{C}$  proton-driven spin diffusion (PDS) solid-state NMR spectra of wild-type hVDAC-1 in DMPC liposomes, demonstrating the structural integrity of the protein.

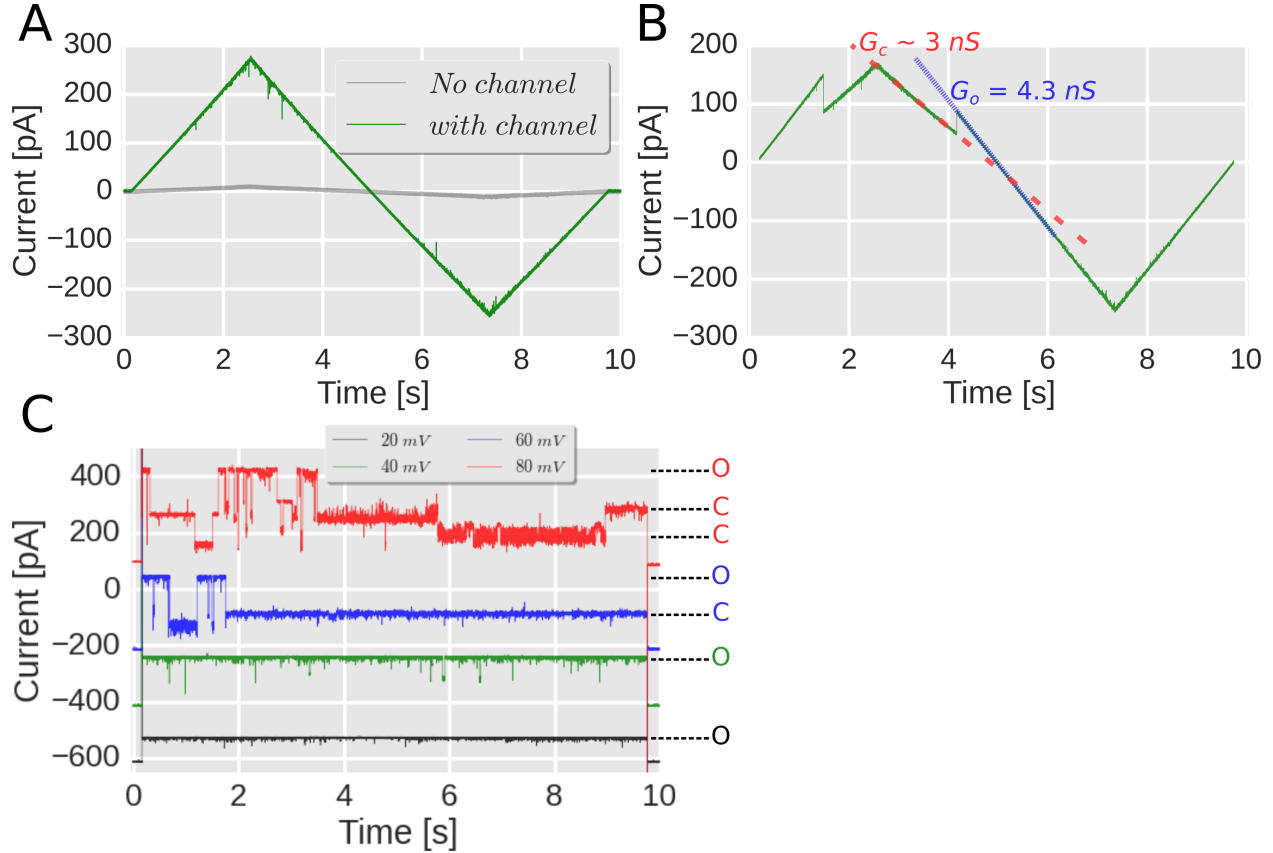

Supplementary Figure S3: **Experimental electrophysiology traces at 1 M KCl.** **A.** Current response of a DPhPC/cholesterol membrane with and without an inserted hVDAC-1. A voltage-ramp with a frequency of  $100 \text{ mHz}$  and an amplitude of  $\pm 60 \text{ mV}$  was applied. Without the protein, a conductance of  $0.042 \text{ nS}$  is found. In the presence of a single hVDAC-1 a conductance in the range from 4 to  $4.5 \text{ nS}$  was obtained. **B.** Current response of a DPhPC/cholesterol membrane with a single hVDAC-1 inserted. The voltage-ramp protocol is the same as in **A**. At larger potentials the channel closes and opens again as indicated by the stepwise drop and rise in current, resulting in a change in conductance from a value of  $4\text{--}4.5 \text{ nS}$  ( $G_o$  blue segmented line) to a value of below  $3 \text{ nS}$  ( $G_c$  red segmented line). **C.** Voltage-clamp current traces of a DPhPC/cholesterol membrane with a single hVDAC-1 inserted. Traces of  $10 \text{ s}$  were measured at  $20 \text{ mV}$  (black),  $40 \text{ mV}$  (green),  $60 \text{ mV}$  (blue), and  $80 \text{ mV}$  (red). At constant lower potentials, the channel remains mostly in the ‘open’ state (O). At larger potentials, the channel ‘closes’ (C), visiting several less conductive states.

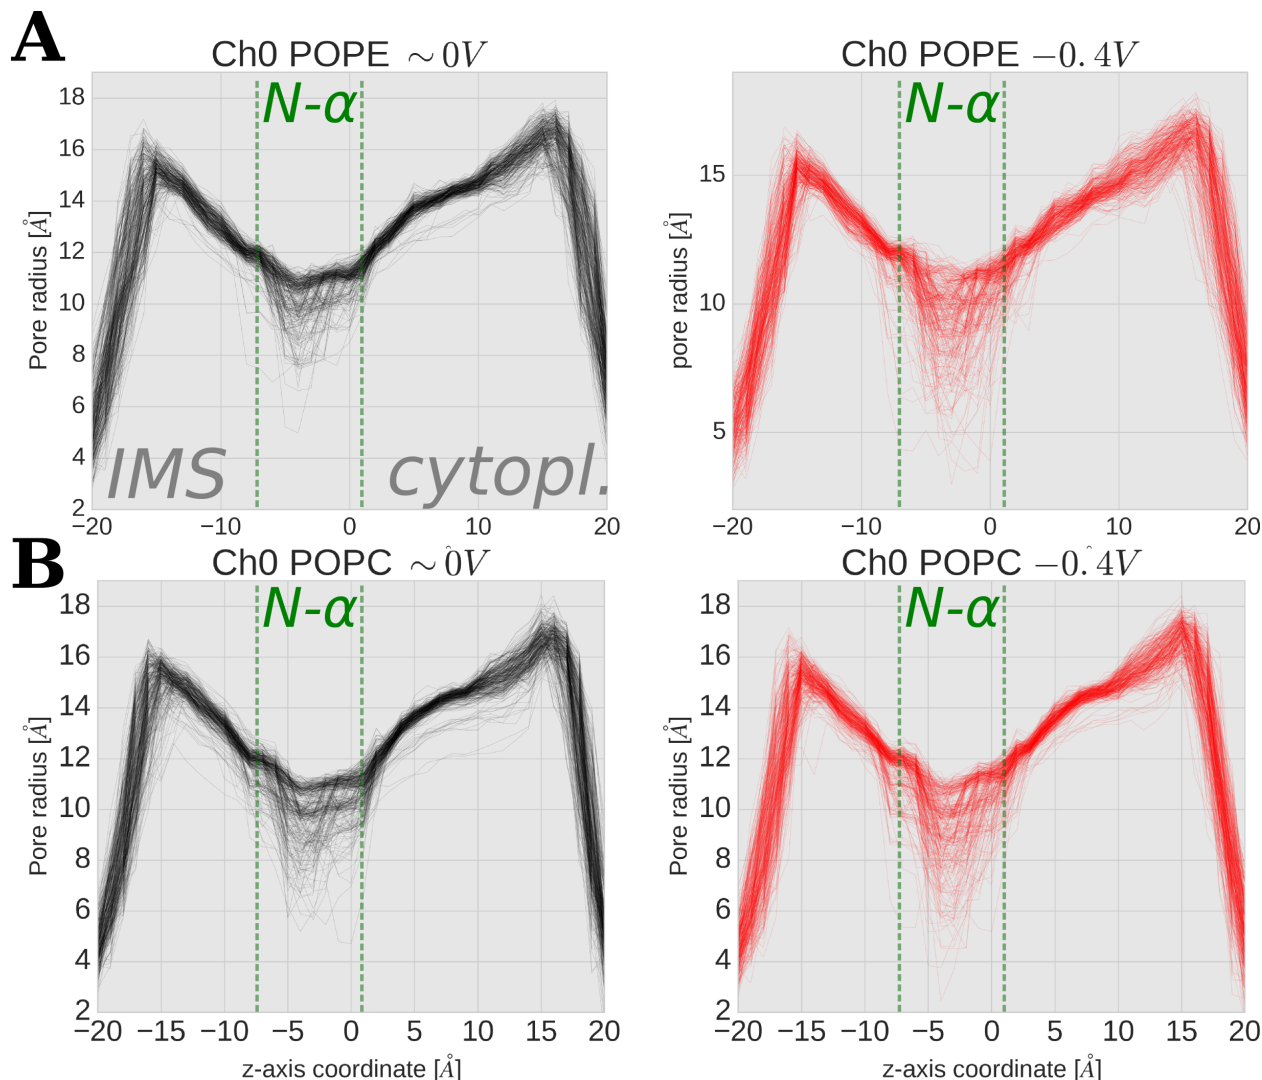

Supplementary Figure S4: **Pore radius profiles of VDAC at negative Voltages.** The `trj_cavity` software (1) was used to calculate the pore radius profiles. The found pores covered a region of  $\sim 32$  Å, spanning the IMS (negative  $z$ ) and cytoplasmatic (positive  $z$ ) sides of the pore. The  $z = 0$  correspond to the center of mass of the protein. The location of  $N\text{-}\alpha$  is marked by the green segmented lines. **A** Pore radius profiles of mVDAC-1 simulated in POPE lipids. A constant ion difference of  $2q$  translated in an average voltage estimate of  $\sim 0$  V, left (black lines). A constant ion difference of  $14q$  translated in an average voltage estimate of  $\sim -0.4$  V, right (red lines). **B** Pore radius profiles of mVDAC-1 simulated in POPC lipids. A constant ion difference of  $2q$  translated in an average voltage estimate of  $\sim 0$  V, left (black lines). A constant ion difference of  $14q$  translated in an average voltage estimate of  $\sim -0.4$  V, right (red lines). The narrower region of the pore profile coincides with the location of  $N\text{-}\alpha$ .

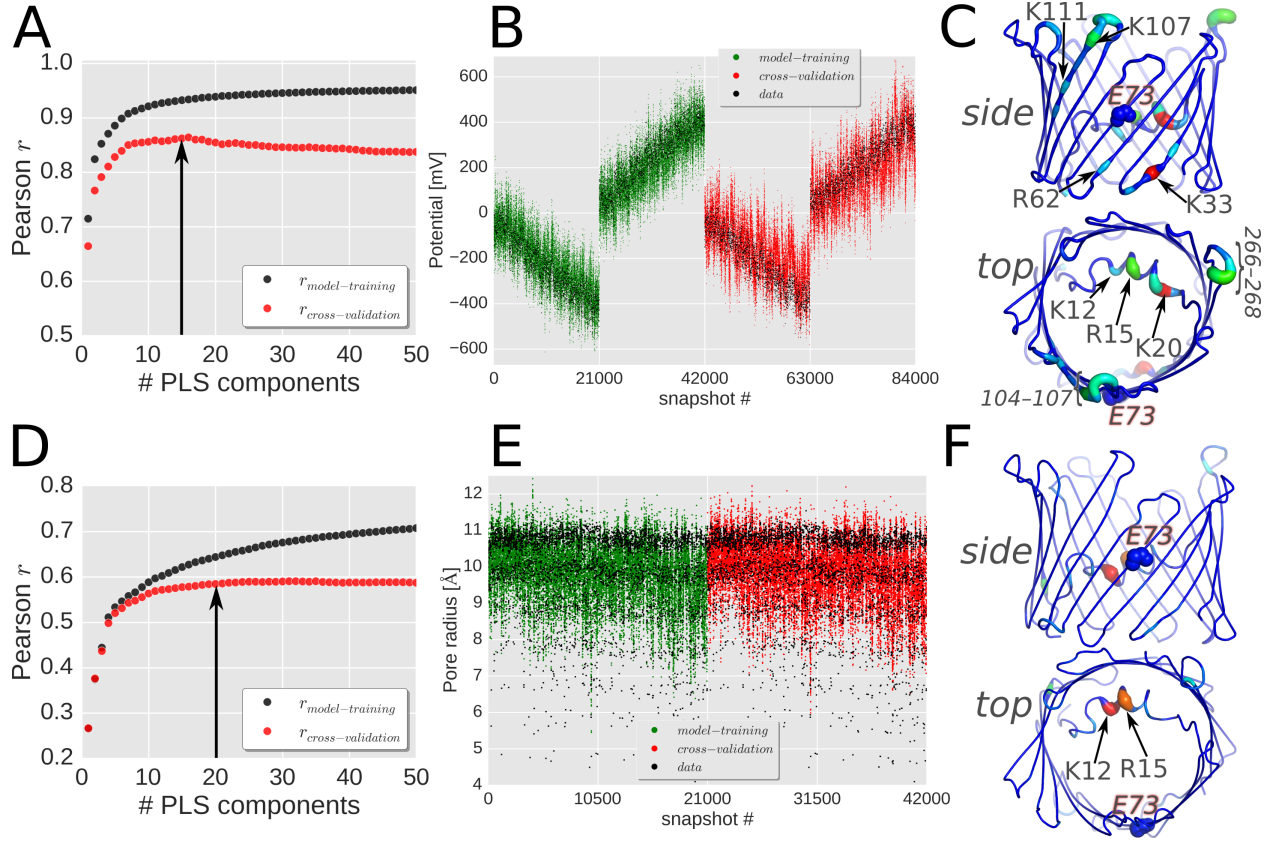

Supplementary Figure S5: **PLS-FMA conformational models cross-validation and amino acid contribution to fluctuations.** The models were constructed using the time-averaged voltage (1 ns) of VDAC simulations and the instantaneous minimal pore radius ( $min_r$ ), these values were correlated with the structures of the protein without hydrogens, which correspond to 2171 atoms. Half of the data was used for model-training and the other half for cross-validation. **A–C** PLS-FMA information for the voltage conformational model. 84000 frames were used in total. **A** shows that the Pearson correlation coefficient converges at 15 components (*black arrow*). **B**. Original data, model-training (mVDAC-1 in PE lipids) and cross-validation part (mVDAC-1 in PC lipids) of the 15 components conformational model. **C**. The RMSF (root mean squared fluctuation) of the amino acids in the conformational model. This indicates the amino acids which fluctuate the most along the voltage conformational model. Colors closer to red in a *BGR* color scale, and broader tube widths indicate more mobile amino acids. The location of E73 in the barrel is indicated by the blue spheres. **D–F** PLS-FMA information for the  $min_r$  *ch0*. 42000 frames were used in total. **D** shows that the Pearson correlation coefficient converges at 20 components (*black arrow*). **E**. Original data, model-training and cross-validation part of the 20 components conformational model. **F**. The RMSF (root mean squared fluctuation) of the amino acids in the conformational model. This indicates the amino acids which fluctuate the most along the  $min_r$  conformational model. Colors closer to red in a *BGR* color scale (*blue-green-red*), and broader tube widths indicate more mobile amino acids. The location of E73 in the barrel is indicated by the blue spheres.

Table S1. Forces and Electric field acting on KRK and R218 aas.

|                                                 |                   | K20               |                    | R15              |                    | K12               |                    | R218              |                   |
|-------------------------------------------------|-------------------|-------------------|--------------------|------------------|--------------------|-------------------|--------------------|-------------------|-------------------|
| $\Delta q$<br>(potential)                       | ChX<br>(polarity) | Total             | Electrost.         | Total            | Electrost.         | Total             | Electrost.         | Total             | Electrost.        |
| Forces [kJ mol <sup>-1</sup> nm <sup>-1</sup> ] |                   |                   |                    |                  |                    |                   |                    |                   |                   |
| 0 (~0 V)                                        | 0 (–)             | -18.4<br>(±750)   | -238.9<br>(±404.8) | 0.5<br>(±536.6)  | -82.8<br>(±358.6)  | -19.9<br>(±614.2) | -88.6<br>(±337.7)  | 16.7<br>(±550.5)  | 56.8<br>(±295.8)  |
| 0                                               | 1 (+)             | 15.0<br>(±807.4)  | -170.3<br>(±394.3) | 1.4<br>(±523.1)  | -101.4<br>(±416.5) | 9.2<br>(±651.3)   | -60.8<br>(±408.1)  | 11.7<br>(±556.9)  | 149.0<br>(±335.8) |
| 14 (~0.4 V)                                     | 0 (–)             | -4.5<br>(±614.3)  | 428.3<br>(±444.1)  | 5.4<br>(±555.8)  | 257.8<br>(±332.8)  | 12.8<br>(±591.3)  | -68.9<br>(±391.4)  | -0.9<br>(±557.1)  | 154.2<br>(±342.3) |
| 14 (+0.4 V)                                     | 1 (+)             | -19.6<br>(±786.6) | -270.0<br>(±407.5) | -0.1<br>(±554.3) | -207.1<br>(±374.3) | -6.3<br>(±628.9)  | -207.9<br>(±371.0) | -12.7<br>(±592.3) | 42.5<br>(±319.1)  |
| [V nm <sup>-1</sup> ]                           |                   |                   |                    |                  |                    |                   |                    |                   |                   |
| 0 (~0 V)                                        | 0 (–)             | -0.2              | -2.5               | 0                | -0.9               | -0.2              | -0.9               | 0.2               | 0.6               |
| 0                                               | 1 (+)             | 0.2               | -1.8               | 0                | -1.1               | 0.1               | -0.6               | 0.1               | 1.5               |
| 14 (~0.4 V)                                     | 0 (–)             | 0                 | 4.4                | 0.1              | 2.7                | 0.1               | -0.7               | 0                 | 1.6               |
| 14 (+0.4 V)                                     | 1 (+)             | -0.2              | -2.8               | 0                | -2.1               | -0.1              | -2.2               | -0.1              | 0.4               |

Average forces and field were calculated on the COM of the side-chain atoms.

Table S2. Salt bridging analysis of selected positive mVDAC-1 amino acids

|            |               | K20   |                 |                                        | R15   |               |                       | K12   |          |                       | R218  |          |                       |
|------------|---------------|-------|-----------------|----------------------------------------|-------|---------------|-----------------------|-------|----------|-----------------------|-------|----------|-----------------------|
| $\Delta q$ | Chx(polarity) | P(sb) | partners        | Mean-Z-N+ ( $\pm$ SD) [ $\text{\AA}$ ] | P(sb) | partners      | Mean-Z-N+ ( $\pm$ SD) | P(sb) | partners | Mean-Z-N+ ( $\pm$ SD) | P(sb) | partners | Mean-Z-N+ ( $\pm$ SD) |
| 2          | 0 (-)         | 0.39  | D16, E280       | -5.6 ( $\pm$ 1.9)                      | 0.04  | D16, D9       | 0.6 ( $\pm$ 1.9)      | 0.42  | D16, D9  | -6.3 ( $\pm$ 1.3)     | 0.90  | E189     | 12.1 ( $\pm$ 1.3)     |
| 2          | 1 (+)         | 0.40  | D16, E280       | -6.0 ( $\pm$ 1.8)                      | 0.12  | D16, D9       | -0.6 ( $\pm$ 1.5)     | 0.38  | D16, D9  | -6.9 ( $\pm$ 1.3)     | 0.90  | E189     | 12.4 ( $\pm$ 1.2)     |
| 8          | 0             | 0.13  | D16             | -4.3 ( $\pm$ 2.4)                      | 0.01  | D16, D9, E189 | 1.2 ( $\pm$ 2.0)      | 0.41  | D16, D9  | -5.7 ( $\pm$ 1.6)     | 0.77  | E189     | 12.6 ( $\pm$ 1.7)     |
| 8          | 1             | 0.26  | D16, E203, E280 | -6.8 ( $\pm$ 1.6)                      | 0.14  | D16, D9       | -0.8 ( $\pm$ 1.6)     | 0.38  | D16, D9  | -7.3 ( $\pm$ 1.2)     | 0.86  | E189     | 12.4 ( $\pm$ 1.1)     |
| 14         | 0             | 0.21  | D16             | -0.0 ( $\pm$ 3.2)                      | 0.04  | D16, E189     | 2.5 ( $\pm$ 2.1)      | 0.40  | D16, D9  | -5.1 ( $\pm$ 1.8)     | 0.62  | E189     | 13.6 ( $\pm$ 2.0)     |
| 14         | 1             | 0.32  | D16, E203       | -7.7 ( $\pm$ 1.4)                      | 0.21  | D16, D9       | -1.3 ( $\pm$ 1.7)     | 0.29  | D16, D9  | -7.8 ( $\pm$ 1.3)     | 0.82  | E189     | 12.4 ( $\pm$ 1.4)     |

  

|            |               | R120  |          |                       | K109  |          |                       | K53   |          |                       | K113  |                        |                       |
|------------|---------------|-------|----------|-----------------------|-------|----------|-----------------------|-------|----------|-----------------------|-------|------------------------|-----------------------|
| $\Delta q$ | Chx(polarity) | P(sb) | partners | Mean-Z-N+ ( $\pm$ SD) | P(sb) | partners | Mean-Z-N+ ( $\pm$ SD) | P(sb) | partners | Mean-Z-N+ ( $\pm$ SD) | P(sb) | partners               | Mean-Z-N+ ( $\pm$ SD) |
| 2          | 0 (-)         | 0.98  | E121     | -16.1 ( $\pm$ 0.8)    | 0.43  | D132     | 16.4 ( $\pm$ 2.0)     | 0.18  | D78      | 14.3 ( $\pm$ 2.1)     | 0.28  | D100, D128, D130, D132 | 8.0 ( $\pm$ 1.2)      |
| 2          | 1 (+)         | 0.74  | E121     | -15.9 ( $\pm$ 1.1)    | 0.47  | D132     | 17.3 ( $\pm$ 2.0)     | 0.14  | D78      | 14.3 ( $\pm$ 2.0)     | 0.27  | D100, D128, D130, D132 | 7.6 ( $\pm$ 1.2)      |
| 8          | 0             | 0.90  | E121     | -16.1 ( $\pm$ 0.8)    | 0.54  | D132     | 15.8 ( $\pm$ 2.1)     | 0.14  | D78      | 14.3 ( $\pm$ 2.0)     | 0.30  | D100, D128, D130, D132 | 8.6 ( $\pm$ 1.3)      |
| 8          | 1             | 0.75  | E121     | -15.9 ( $\pm$ 0.9)    | 0.69  | D132     | 16.4 ( $\pm$ 1.9)     | 0.15  | D78      | 14.5 ( $\pm$ 2.0)     | 0.39  | D100, D128, D130       | 7.3 ( $\pm$ 0.9)      |
| 14         | 0             | 0.99  | E121     | -15.9 ( $\pm$ 0.8)    | 0.30  | D132     | 16.2 ( $\pm$ 2.0)     | 0.12  | D78      | 14.6 ( $\pm$ 2.0)     | 0.39  | D100, D128, D130, D132 | 8.9 ( $\pm$ 1.1)      |
| 14         | 1             | 0.68  | E121     | -15.7 ( $\pm$ 1.0)    | 0.49  | D132     | 16.6 ( $\pm$ 1.9)     | 0.45  | D78      | 13.1 ( $\pm$ 2.0)     | 0.27  | D100, D128, D130, D132 | 7.2 ( $\pm$ 1.1)      |

P(sb) is defined by the proportion of  $N_{\alpha}-O_{\alpha}$  distances below 4.5  $\text{\AA}$ .

Mean-ZN+ defines the mean Z-coordinate ( $\pm$ SD) of the side-chain nitrogens. Zero correspond to the Protein COM, IMS values in the negative, and cytosolic positive.

10 replicas, 30 ns each were used for each ion difference ( $\Delta q$ ) and channel polarity Chx (Ch0 (-) and Ch1 (+)).
